## Subject Index

---

- Acidification 83
- Acute tubular necrosis 234
- $\beta$ -Adrenoceptor stimulation 355
- Adult enuresis 322
- Alkaline urine 83
- Aloglutamol 213
- Anuria-infusion pyelography, value and limitations 422
- Axonal transport 427
  
- Bencyclane 267
- Benign prostatic hypertrophy 40
- Bladder 14, 31, 150
  - base insufficiency 144
  - capacity 310
  - distention 130
  - dynamics 366
  - inhibition 440
  - neck 159
  - – hypertrophy 285
  - – obstruction 175
  - outflow obstruction 53, 171
  - physiology 4
  - stimulation 366
  - training 327
  - transection 322
- $\alpha$ -Blockers 304
- Blood glucose 417
  
- Carbon dioxide perfusion 345
  - – urethral pressure profile 40
- Carcinoma in diverticulum of female urethra 393
- Catheter 79
- Cell culture 205
- Classification 285
- Closure pressure 111
- Colpocystourethrography 144
- Colposuspension 144, 150
- Complications in prostatectomy 187
- Computer analysis 74, 337
- Contractility 31
- Correction 150
- Credé maneuver 293
- Cystometric and UCpp studies 120
- Cystometry 14, 50, 60, 68, 83
  
- Decay curves 50
- Deep freezing 205
- Detrusor 74
  - hyperreflexia 191, 316
  - – urge incontinence 120
  - instability 130
  - -sphincter dyssynergia 285, 293
- DNA synthesis 205
- Dogs 427
- Double contrast cystography 222
  
- Early reappearance of pelvic floor reflexes 293
- Electromyogram 74
- Electromyography 40
- Electronic simulation 50
- Elastic models urethra 175
- Embolization 252
- Emeprium bromide 130
  - – (Cetiprin) 120
- Eosinophile ureteritis 222
- Epidemiology 417
- Escape resistance 345
- Estrogenic influence on serum lipid 135
  - – – vesical trigone, urethra and vagina 135
- Estrogens 135
- Exponential model 14
- External urethral sphincter 199
- Exteroceptive vs. proprioceptive urethral reflexes 293
  
- Female cystitis 260
  - incontinence 68
- 15-min urinary PSP excretion 435
- Fistula 370
- Flap 150
- Flow rate 53
- Frozen section during surgery 227
  
- Glucose tolerance 417
- Graft failure 234
  
- Hemodialysis 213
- Horseradish peroxidase tracer 427
- Human urinary bladder 355

- Hydrodynamics 381
- Hypercalciuria 417
- Hyperparathyroidism 213
- Hyperphosphatemia 213
- Incontinence 150, 159, 191
- Indication for prostatectomy 53
- Innervation 359
- Intermittent self-catheterization 310
- Intratumoral Leydig cells 245
- Intravaginal electrical stimulation 440
- Intrinsic sphincter 199
- Irradiated cervical cancer 370
- Irrigating fluids 83
- Irritable bladder 83
- Isometric cystometry 31
- Kidney 399
  - preservation 205
  - transplantation 234
- Late reappearance of detrusor reflex 293
- Lower motor neuron bladder 327
- Malignant kidney tumours 252
- Measurement 79
- Medium fill with water 60
- Membrane catheter 27, 345
- Methantheline bromide (Banthine®) 316
- Mictiometry 88
- Micturition 4
  - control 427
  - cystourethrography 68
  - parameter 337
- Multiple sclerosis 120
- Myelomeningocele 327
- Myotropic spasmolysis 267
- Neurogenic bladder 4, 130, 279, 285, 304
  - – dysfunction 310
- Obstructive uropathy 422
- Parasympatholytic hydrochloride 130
- Parasympatholytica 316
- Passive properties 14
- Perianal flora 260
- Phosphaturia 83
- Phosphocalcic metabolism 213
- Postmenopausal women 135
- Postpubertal untreated cryptorchidism 245
- Profilometry 381
- Propantheline bromide 130
- Prostate 159
  - size 187
- Prostatectomy 181, 191
  - technique 187
- Radiological diagnosis 422
- Rapid fill with CO<sub>2</sub> 60
- Reflex bladder 130
- Rejection 234
- Relation to d verticulum and Carcinoma of the urethra 393
- Renal parenchymal disease 422
  - pelvis 399
  - stones 417
- Retrograde pyelography 222
- Rotameter 88
- Sacral nerve stimulation 22
- Semiology 393
- Sensory urge incontinence 135
- Serum insulin 417
- Sing operation 117
- 60-min plasma phenolsulfonphthalein concentration (PSP<sub>60</sub>) 435
- Sling operation 150
- Smooth muscle 393
  - sphincter mechanism 199
- Sphincter damage 191
- Sphincterotomy 310
- Spina bifida 279
- Spinalized animal model 293
- Spinal nuclei 427
- Stepwise cystometry 14
- Stimulation of the bladder 279
- Storage of information 27
- Stress 150
  - incontinence 40, 111, 144
- Suprapubic transvesical prostatectomy 187
- Surgery 150, 370
- Sympathetic 359
  - innervation 304
- Symptoms 171
- Tantalum suspension 222
- Therapy 393
- Total urethral resistance 345
- Transducer 79

- Transperitoneal tumournephrectomy 252
- Trigonocele 144
- Tubular sclerosis 245
- 24-hour endogenous creatine clearance 435
- Ultrasonic 88
- Unstable urethra 22
- Ureter 381
- Ureteral endometriosis 227
  - peristalsis 393
- Ureteric colic 267
  - tumor 222
- Ureterocystoneostomy 227
- Uretero-ureterostomy 227
  - -vesical junction 381
- Urethra 304
- Urethral closure mechanism 199
  - – pressure profile 135
  - innervation 22
  - length 111
  - pressure profile 40, 68, 79, 107, 117, 199, 345, 381
- Urethritis 377
- Urethrocystometry 377
- Urge incontinence 130
- Urgency 377
- Urinary 150
  - bladder 14, 359
  - continence 199
  - dead space 435
  - enzyme 234
  - flow curve 337
  - incontinence 130, 135, 316
  - – urge 107
  - sodium concentration 234
  - stress incontinence 117
  - tract infections 83
  - volume 337
- Urodynamic checklists 27
  - equipment 27
  - examination 144
- Urodynamics 4, 31, 53, 68, 83, 171, 175, 181, 285, 310, 381
- Uroflowmeter 337
- Uroflowmetry 88
- Uropathy 159
- Vaginal flora 260
  - repair 144
- Vesical descensus 144
- Vesicourethral function 4
  - reflux 327
- Viscoelasticity 14
- Voiding efficiency 53
  - mechanisms 4
- Volume registration 355
- Volumeter 88
- Water perfusion 345
- Wide bladder neck anomaly 285
